# Supplementary material
Source: publisher figshare collection journal article supplement (https://acs.figshare.com/ndownloader/files/4313455)
Supplement: Supplementary file 1 [file 4313455]

 
data_100501lm 
 
_audit_creation_method            SHELXL-97 
_chemical_name_systematic 
; 
 ? 
; 
_chemical_name_common             ? 
_chemical_melting_point           ? 
_chemical_formula_moiety          ? 
_chemical_formula_sum 
 'C33 H26 Cl2 N O6 P' 
_chemical_formula_weight          634.42 
 
loop_ 
 _atom_type_symbol 
 _atom_type_description 
 _atom_type_scat_dispersion_real 
 _atom_type_scat_dispersion_imag 
 _atom_type_scat_source 
 'C'  'C'   0.0033   0.0016 
 'International Tables Vol C Tables 4.2.6.8 and 6.1.1.4' 
 'H'  'H'   0.0000   0.0000 
 'International Tables Vol C Tables 4.2.6.8 and 6.1.1.4' 
 'N'  'N'   0.0061   0.0033 
 'International Tables Vol C Tables 4.2.6.8 and 6.1.1.4' 
 'O'  'O'   0.0106   0.0060 
 'International Tables Vol C Tables 4.2.6.8 and 6.1.1.4' 
 'P'  'P'   0.1023   0.0942 
 'International Tables Vol C Tables 4.2.6.8 and 6.1.1.4' 
 'Cl'  'Cl'   0.1484   0.1585 
 'International Tables Vol C Tables 4.2.6.8 and 6.1.1.4' 
 
_symmetry_cell_setting            triclinic
_symmetry_space_group_name_H-M   'P -1'
_symmetry_space_group_name_hall  '-P 1' 
 
loop_ 
 _symmetry_equiv_pos_as_xyz 
 'x, y, z' 
 '-x, -y, -z' 
 
_cell_length_a                    10.5159(7) 
_cell_length_b                    12.1257(8) 
_cell_length_c                    12.5652(8) 
_cell_angle_alpha                 86.1150(10) 
_cell_angle_beta                  75.7750(10) 
_cell_angle_gamma                 74.1080(10) 
_cell_volume                      1493.74(17) 
_cell_formula_units_Z             2 
_cell_measurement_temperature     100(2) 
_cell_measurement_reflns_used     5270
_cell_measurement_theta_min       2.5
_cell_measurement_theta_max       25
 
_exptl_crystal_description        Lump
_exptl_crystal_colour             Red
_exptl_crystal_size_max           0.35
_exptl_crystal_size_mid           0.30
_exptl_crystal_size_min           0.18
_exptl_crystal_density_meas       'not measured'
_exptl_crystal_density_diffrn     1.411 
_exptl_crystal_density_method     'not measured' 
_exptl_crystal_F_000              656 
_exptl_absorpt_coefficient_mu     0.318 
_exptl_absorpt_correction_type    multi-scan
_exptl_absorpt_correction_T_min   0.6171
_exptl_absorpt_correction_T_max   0.7454
_exptl_absorpt_process_details    'SADABS V2008/1 (Bruker AXS)' 
 
_exptl_special_details 
; 
 ? 
; 
 
_diffrn_ambient_temperature       100(2) 
_diffrn_radiation_wavelength      0.71073 
_diffrn_radiation_type            MoK\a 
_diffrn_radiation_source          'fine-focus sealed tube' 
_diffrn_radiation_monochromator   graphite 
_diffrn_measurement_device_type   'Bruker APEX-II CCD'
_diffrn_measurement_method        '\f and \w scans'
_diffrn_detector_area_resol_mean  8.3666 
_diffrn_reflns_number             15544 
_diffrn_reflns_av_R_equivalents   0.0266 
_diffrn_reflns_av_sigmaI/netI     0.0342 
_diffrn_reflns_limit_h_min        -13 
_diffrn_reflns_limit_h_max        13 
_diffrn_reflns_limit_k_min        -15 
_diffrn_reflns_limit_k_max        15 
_diffrn_reflns_limit_l_min        -15 
_diffrn_reflns_limit_l_max        15 
_diffrn_reflns_theta_min          1.67 
_diffrn_reflns_theta_max          26.45 
_reflns_number_total              6148 
_reflns_number_gt                 5145 
_reflns_threshold_expression      >2sigma(I) 
 
_computing_data_collection        'APEX2 (Bruker AXS, 2010)'
_computing_cell_refinement        'SAINT V7.34A (Bruker AXS, 2006)'
_computing_data_reduction         'SAINT V7.34A (Bruker AXS, 2006)'
_computing_structure_solution     'SHELXS-97 (Sheldrick, 2008)'
_computing_structure_refinement   'SHELXL-97 (Sheldrick, 2008)'
_computing_molecular_graphics     'SHELXTL (Sheldrick, 2008)'
_computing_publication_material   'SHELXTL'
 
_refine_special_details 
; 
 Refinement of F^2^ against ALL reflections.  The weighted R-factor wR and 
 goodness of fit S are based on F^2^, conventional R-factors R are based 
 on F, with F set to zero for negative F^2^. The threshold expression of 
 F^2^ > 2sigma(F^2^) is used only for calculating R-factors(gt) etc. and is 
 not relevant to the choice of reflections for refinement.  R-factors based 
 on F^2^ are statistically about twice as large as those based on F, and R- 
 factors based on ALL data will be even larger. 
; 
 
_refine_ls_structure_factor_coef  Fsqd  
_refine_ls_matrix_type            full 
_refine_ls_weighting_scheme       calc  
_refine_ls_weighting_details 
 'calc w=1/[\s^2^(Fo^2^)+(0.0639P)^2^+0.5940P] where P=(Fo^2^+2Fc^2^)/3' 
_atom_sites_solution_primary      direct 
_atom_sites_solution_secondary    difmap 
_atom_sites_solution_hydrogens    geom 
_refine_ls_hydrogen_treatment     constr 
_refine_ls_extinction_method      none 
_refine_ls_extinction_coef        ? 
_refine_ls_number_reflns          6148 
_refine_ls_number_parameters      389 
_refine_ls_number_restraints      0 
_refine_ls_R_factor_all           0.0530 
_refine_ls_R_factor_gt            0.0438 
_refine_ls_wR_factor_ref          0.1194 
_refine_ls_wR_factor_gt           0.1111 
_refine_ls_goodness_of_fit_ref    1.049 
_refine_ls_restrained_S_all       1.049 
_refine_ls_shift/su_max           0.001 
_refine_ls_shift/su_mean          0.000 
 
loop_ 
 _atom_site_label 
 _atom_site_type_symbol 
 _atom_site_fract_x 
 _atom_site_fract_y 
 _atom_site_fract_z 
 _atom_site_U_iso_or_equiv 
 _atom_site_adp_type 
 _atom_site_occupancy 
 _atom_site_symmetry_multiplicity 
 _atom_site_calc_flag 
 _atom_site_refinement_flags 
 _atom_site_disorder_assembly 
 _atom_site_disorder_group 
C1 C 0.03487(18) 0.59760(14) 0.28509(14) 0.0191(4) Uani 1 1 d . . . 
C2 C 0.12420(17) 0.64209(14) 0.19969(14) 0.0179(4) Uani 1 1 d . . . 
C3 C 0.26090(18) 0.59734(14) 0.21676(14) 0.0187(4) Uani 1 1 d . . . 
C4 C 0.24940(17) 0.53127(15) 0.30957(14) 0.0194(4) Uani 1 1 d . . . 
C5 C 0.34817(18) 0.46270(15) 0.36759(15) 0.0197(4) Uani 1 1 d . . . 
C6 C 0.48065(19) 0.40534(16) 0.31124(15) 0.0230(4) Uani 1 1 d . . . 
H6 H 0.5079 0.4133 0.2339 0.028 Uiso 1 1 calc R . . 
C7 C 0.57147(19) 0.33753(16) 0.36721(15) 0.0230(4) Uani 1 1 d . . . 
H7 H 0.6605 0.2979 0.3290 0.028 Uiso 1 1 calc R . . 
C8 C 0.53019(19) 0.32840(16) 0.48018(15) 0.0223(4) Uani 1 1 d . . . 
C9 C 0.40073(19) 0.38299(16) 0.53914(15) 0.0225(4) Uani 1 1 d . . . 
H9 H 0.3750 0.3749 0.6166 0.027 Uiso 1 1 calc R . . 
C10 C 0.30976(18) 0.44974(15) 0.48208(15) 0.0208(4) Uani 1 1 d . . . 
H10 H 0.2201 0.4873 0.5209 0.025 Uiso 1 1 calc R . . 
C11 C -0.11043(17) 0.82950(15) 0.17957(14) 0.0189(4) Uani 1 1 d . . . 
C12 C -0.21049(18) 0.78248(15) 0.16192(15) 0.0213(4) Uani 1 1 d . . . 
H12 H -0.1858 0.7187 0.1142 0.026 Uiso 1 1 calc R . . 
C13 C -0.34593(19) 0.82851(17) 0.21376(16) 0.0262(4) Uani 1 1 d . . . 
H13 H -0.4141 0.7965 0.2016 0.031 Uiso 1 1 calc R . . 
C14 C -0.3812(2) 0.92161(18) 0.28355(17) 0.0302(5) Uani 1 1 d . . . 
H14 H -0.4736 0.9519 0.3207 0.036 Uiso 1 1 calc R . . 
C15 C -0.2831(2) 0.97072(18) 0.29949(17) 0.0309(5) Uani 1 1 d . . . 
H15 H -0.3087 1.0359 0.3457 0.037 Uiso 1 1 calc R . . 
C16 C -0.14665(19) 0.92475(16) 0.24784(16) 0.0249(4) Uani 1 1 d . . . 
H16 H -0.0790 0.9580 0.2590 0.030 Uiso 1 1 calc R . . 
C17 C 0.16708(18) 0.85742(15) 0.11494(15) 0.0211(4) Uani 1 1 d . . . 
C18 C 0.18971(19) 0.88358(15) 0.21424(16) 0.0247(4) Uani 1 1 d . . . 
H18 H 0.1492 0.8518 0.2809 0.030 Uiso 1 1 calc R . . 
C19 C 0.2713(2) 0.95586(17) 0.21547(19) 0.0310(5) Uani 1 1 d . . . 
H19 H 0.2856 0.9745 0.2830 0.037 Uiso 1 1 calc R . . 
C20 C 0.3316(2) 1.00072(17) 0.1179(2) 0.0361(5) Uani 1 1 d . . . 
H20 H 0.3875 1.0502 0.1189 0.043 Uiso 1 1 calc R . . 
C21 C 0.3113(2) 0.97417(17) 0.0190(2) 0.0346(5) Uani 1 1 d . . . 
H21 H 0.3540 1.0047 -0.0475 0.042 Uiso 1 1 calc R . . 
C22 C 0.22879(19) 0.90314(16) 0.01672(16) 0.0257(4) Uani 1 1 d . . . 
H22 H 0.2142 0.8855 -0.0511 0.031 Uiso 1 1 calc R . . 
C23 C 0.07169(18) 0.72171(15) -0.01879(14) 0.0198(4) Uani 1 1 d . . . 
C24 C 0.01964(18) 0.80574(16) -0.09062(15) 0.0237(4) Uani 1 1 d . . . 
H24 H -0.0189 0.8831 -0.0670 0.028 Uiso 1 1 calc R . . 
C25 C 0.02459(19) 0.77553(17) -0.19616(15) 0.0258(4) Uani 1 1 d . . . 
H25 H -0.0093 0.8325 -0.2454 0.031 Uiso 1 1 calc R . . 
C26 C 0.07907(19) 0.66199(17) -0.23039(15) 0.0255(4) Uani 1 1 d . . . 
H26 H 0.0814 0.6416 -0.3027 0.031 Uiso 1 1 calc R . . 
C27 C 0.1299(2) 0.57859(17) -0.15942(16) 0.0266(4) Uani 1 1 d . . . 
H27 H 0.1670 0.5011 -0.1831 0.032 Uiso 1 1 calc R . . 
C28 C 0.12656(18) 0.60830(16) -0.05334(15) 0.0226(4) Uani 1 1 d . . . 
H28 H 0.1617 0.5512 -0.0047 0.027 Uiso 1 1 calc R . . 
C29 C 0.39066(18) 0.61240(14) 0.15480(14) 0.0192(4) Uani 1 1 d . . . 
H29 H 0.4591 0.6010 0.1948 0.023 Uiso 1 1 calc R . . 
C30 C 0.42716(17) 0.64008(15) 0.04936(14) 0.0193(4) Uani 1 1 d . . . 
H30 H 0.3645 0.6535 0.0038 0.023 Uiso 1 1 calc R . . 
C31 C 0.56738(18) 0.64942(14) 0.00518(14) 0.0189(4) Uani 1 1 d . . . 
C32 C 0.7255(2) 0.69064(18) -0.14927(17) 0.0292(4) Uani 1 1 d . . . 
H32A H 0.7499 0.7423 -0.1058 0.044 Uiso 1 1 calc R . . 
H32B H 0.7308 0.7202 -0.2243 0.044 Uiso 1 1 calc R . . 
H32C H 0.7886 0.6141 -0.1509 0.044 Uiso 1 1 calc R . . 
C33 C 0.8341(2) 0.7636(2) 0.51465(19) 0.0380(5) Uani 1 1 d . . . 
H33A H 0.8516 0.6891 0.5533 0.046 Uiso 1 1 calc R . . 
H33B H 0.8311 0.7487 0.4389 0.046 Uiso 1 1 calc R . . 
Cl1 Cl 0.67464(6) 0.85193(5) 0.58258(5) 0.03909(15) Uani 1 1 d . . . 
Cl2 Cl 0.96871(7) 0.82537(6) 0.50907(5) 0.04931(18) Uani 1 1 d . . . 
N1 N 0.62570(17) 0.25304(14) 0.53899(14) 0.0275(4) Uani 1 1 d . . . 
O1 O 0.59912(15) 0.25950(13) 0.63909(12) 0.0352(4) Uani 1 1 d . . . 
O2 O 0.72830(16) 0.18611(14) 0.48437(13) 0.0427(4) Uani 1 1 d . . . 
O3 O 0.11581(12) 0.52975(10) 0.35298(10) 0.0199(3) Uani 1 1 d . . . 
O4 O -0.08710(12) 0.60515(11) 0.30983(10) 0.0220(3) Uani 1 1 d . . . 
O5 O 0.58814(13) 0.68368(11) -0.10019(10) 0.0249(3) Uani 1 1 d . . . 
O6 O 0.65537(13) 0.62824(11) 0.05557(11) 0.0245(3) Uani 1 1 d . . . 
P1 P 0.06530(4) 0.75860(4) 0.11949(4) 0.01723(12) Uani 1 1 d . . . 
 
loop_ 
 _atom_site_aniso_label 
 _atom_site_aniso_U_11 
 _atom_site_aniso_U_22 
 _atom_site_aniso_U_33 
 _atom_site_aniso_U_23 
 _atom_site_aniso_U_13 
 _atom_site_aniso_U_12 
C1 0.0220(9) 0.0176(8) 0.0164(9) -0.0021(7) -0.0041(7) -0.0031(7) 
C2 0.0177(8) 0.0189(8) 0.0163(9) -0.0010(7) -0.0025(7) -0.0044(7) 
C3 0.0204(9) 0.0182(8) 0.0175(9) -0.0019(7) -0.0047(7) -0.0046(7) 
C4 0.0177(8) 0.0219(9) 0.0176(9) -0.0029(7) -0.0013(7) -0.0054(7) 
C5 0.0208(9) 0.0208(8) 0.0194(9) 0.0004(7) -0.0055(7) -0.0081(7) 
C6 0.0231(9) 0.0276(9) 0.0184(9) 0.0019(7) -0.0043(7) -0.0081(8) 
C7 0.0202(9) 0.0251(9) 0.0235(10) -0.0001(7) -0.0038(7) -0.0067(7) 
C8 0.0247(9) 0.0236(9) 0.0230(10) 0.0036(7) -0.0105(8) -0.0099(7) 
C9 0.0279(10) 0.0257(9) 0.0166(9) 0.0011(7) -0.0057(7) -0.0114(8) 
C10 0.0205(9) 0.0223(9) 0.0191(9) -0.0006(7) -0.0027(7) -0.0065(7) 
C11 0.0186(8) 0.0193(8) 0.0166(9) 0.0023(7) -0.0031(7) -0.0027(7) 
C12 0.0215(9) 0.0206(9) 0.0207(9) 0.0005(7) -0.0057(7) -0.0031(7) 
C13 0.0203(9) 0.0312(10) 0.0269(10) 0.0040(8) -0.0070(8) -0.0064(8) 
C14 0.0206(9) 0.0354(11) 0.0275(11) -0.0029(8) -0.0033(8) 0.0026(8) 
C15 0.0277(10) 0.0305(10) 0.0301(11) -0.0110(8) -0.0050(8) 0.0004(8) 
C16 0.0250(10) 0.0241(9) 0.0252(10) -0.0036(8) -0.0070(8) -0.0039(8) 
C17 0.0184(9) 0.0161(8) 0.0268(10) 0.0003(7) -0.0038(7) -0.0031(7) 
C18 0.0222(9) 0.0202(9) 0.0303(10) -0.0027(8) -0.0057(8) -0.0029(7) 
C19 0.0257(10) 0.0225(9) 0.0465(13) -0.0043(9) -0.0148(9) -0.0025(8) 
C20 0.0238(10) 0.0214(10) 0.0657(16) 0.0049(10) -0.0150(10) -0.0076(8) 
C21 0.0221(10) 0.0255(10) 0.0516(14) 0.0149(9) -0.0055(9) -0.0053(8) 
C22 0.0205(9) 0.0239(9) 0.0279(10) 0.0059(8) -0.0027(8) -0.0020(7) 
C23 0.0169(8) 0.0244(9) 0.0167(9) -0.0004(7) -0.0020(7) -0.0048(7) 
C24 0.0214(9) 0.0225(9) 0.0243(10) 0.0000(7) -0.0044(7) -0.0018(7) 
C25 0.0208(9) 0.0343(10) 0.0204(10) 0.0042(8) -0.0054(7) -0.0047(8) 
C26 0.0222(9) 0.0376(11) 0.0169(9) -0.0037(8) -0.0029(7) -0.0089(8) 
C27 0.0271(10) 0.0272(10) 0.0247(10) -0.0065(8) -0.0042(8) -0.0058(8) 
C28 0.0210(9) 0.0231(9) 0.0228(9) -0.0012(7) -0.0052(7) -0.0041(7) 
C29 0.0187(9) 0.0178(8) 0.0204(9) -0.0007(7) -0.0039(7) -0.0042(7) 
C30 0.0160(8) 0.0211(8) 0.0199(9) -0.0028(7) -0.0034(7) -0.0034(7) 
C31 0.0205(9) 0.0165(8) 0.0184(9) -0.0026(7) -0.0024(7) -0.0041(7) 
C32 0.0249(10) 0.0348(11) 0.0257(10) 0.0009(8) 0.0038(8) -0.0132(8) 
C33 0.0377(12) 0.0388(12) 0.0357(12) -0.0099(10) 0.0025(9) -0.0151(10) 
Cl1 0.0425(3) 0.0366(3) 0.0346(3) -0.0120(2) -0.0031(2) -0.0074(2) 
Cl2 0.0527(4) 0.0757(4) 0.0324(3) 0.0058(3) -0.0109(3) -0.0390(3) 
N1 0.0280(9) 0.0310(9) 0.0280(9) 0.0057(7) -0.0130(7) -0.0107(7) 
O1 0.0392(8) 0.0442(9) 0.0251(8) 0.0079(6) -0.0156(6) -0.0106(7) 
O2 0.0334(8) 0.0485(10) 0.0384(9) 0.0007(7) -0.0141(7) 0.0065(7) 
O3 0.0181(6) 0.0227(6) 0.0184(6) 0.0026(5) -0.0035(5) -0.0058(5) 
O4 0.0174(6) 0.0259(7) 0.0216(7) -0.0002(5) -0.0018(5) -0.0064(5) 
O5 0.0227(7) 0.0328(7) 0.0179(6) 0.0030(5) 0.0001(5) -0.0102(6) 
O6 0.0186(6) 0.0295(7) 0.0251(7) -0.0005(5) -0.0045(5) -0.0068(5) 
P1 0.0173(2) 0.0174(2) 0.0160(2) -0.00043(17) -0.00296(17) -0.00360(17) 
 
_geom_special_details 
; 
 All esds (except the esd in the dihedral angle between two l.s. planes) 
 are estimated using the full covariance matrix.  The cell esds are taken 
 into account individually in the estimation of esds in distances, angles 
 and torsion angles; correlations between esds in cell parameters are only 
 used when they are defined by crystal symmetry.  An approximate (isotropic) 
 treatment of cell esds is used for estimating esds involving l.s. planes. 
; 
 
loop_ 
 _geom_bond_atom_site_label_1 
 _geom_bond_atom_site_label_2 
 _geom_bond_distance 
 _geom_bond_site_symmetry_2 
 _geom_bond_publ_flag 
C1 O4 1.222(2) . ? 
C1 O3 1.417(2) . ? 
C1 C2 1.424(2) . ? 
C2 C3 1.455(2) . ? 
C2 P1 1.7406(17) . ? 
C3 C4 1.369(2) . ? 
C3 C29 1.448(2) . ? 
C4 O3 1.381(2) . ? 
C4 C5 1.456(2) . ? 
C5 C10 1.406(2) . ? 
C5 C6 1.406(2) . ? 
C6 C7 1.380(3) . ? 
C6 H6 0.9500 . ? 
C7 C8 1.385(3) . ? 
C7 H7 0.9500 . ? 
C8 C9 1.385(3) . ? 
C8 N1 1.470(2) . ? 
C9 C10 1.385(3) . ? 
C9 H9 0.9500 . ? 
C10 H10 0.9500 . ? 
C11 C12 1.393(3) . ? 
C11 C16 1.396(2) . ? 
C11 P1 1.8045(17) . ? 
C12 C13 1.386(3) . ? 
C12 H12 0.9500 . ? 
C13 C14 1.388(3) . ? 
C13 H13 0.9500 . ? 
C14 C15 1.383(3) . ? 
C14 H14 0.9500 . ? 
C15 C16 1.394(3) . ? 
C15 H15 0.9500 . ? 
C16 H16 0.9500 . ? 
C17 C18 1.398(3) . ? 
C17 C22 1.401(3) . ? 
C17 P1 1.8022(19) . ? 
C18 C19 1.387(3) . ? 
C18 H18 0.9500 . ? 
C19 C20 1.385(3) . ? 
C19 H19 0.9500 . ? 
C20 C21 1.384(3) . ? 
C20 H20 0.9500 . ? 
C21 C22 1.386(3) . ? 
C21 H21 0.9500 . ? 
C22 H22 0.9500 . ? 
C23 C28 1.391(2) . ? 
C23 C24 1.402(3) . ? 
C23 P1 1.8042(18) . ? 
C24 C25 1.385(3) . ? 
C24 H24 0.9500 . ? 
C25 C26 1.391(3) . ? 
C25 H25 0.9500 . ? 
C26 C27 1.385(3) . ? 
C26 H26 0.9500 . ? 
C27 C28 1.394(3) . ? 
C27 H27 0.9500 . ? 
C28 H28 0.9500 . ? 
C29 C30 1.333(2) . ? 
C29 H29 0.9500 . ? 
C30 C31 1.475(2) . ? 
C30 H30 0.9500 . ? 
C31 O6 1.208(2) . ? 
C31 O5 1.344(2) . ? 
C32 O5 1.447(2) . ? 
C32 H32A 0.9800 . ? 
C32 H32B 0.9800 . ? 
C32 H32C 0.9800 . ? 
C33 Cl2 1.759(2) . ? 
C33 Cl1 1.768(2) . ? 
C33 H33A 0.9900 . ? 
C33 H33B 0.9900 . ? 
N1 O1 1.223(2) . ? 
N1 O2 1.235(2) . ? 
 
loop_ 
 _geom_angle_atom_site_label_1 
 _geom_angle_atom_site_label_2 
 _geom_angle_atom_site_label_3 
 _geom_angle 
 _geom_angle_site_symmetry_1 
 _geom_angle_site_symmetry_3 
 _geom_angle_publ_flag 
O4 C1 O3 117.79(15) . . ? 
O4 C1 C2 135.44(16) . . ? 
O3 C1 C2 106.77(14) . . ? 
C1 C2 C3 107.35(15) . . ? 
C1 C2 P1 122.30(13) . . ? 
C3 C2 P1 127.93(13) . . ? 
C4 C3 C29 122.12(16) . . ? 
C4 C3 C2 106.48(15) . . ? 
C29 C3 C2 131.40(16) . . ? 
C3 C4 O3 111.07(15) . . ? 
C3 C4 C5 133.09(17) . . ? 
O3 C4 C5 115.82(15) . . ? 
C10 C5 C6 118.81(16) . . ? 
C10 C5 C4 119.68(16) . . ? 
C6 C5 C4 121.47(16) . . ? 
C7 C6 C5 120.67(17) . . ? 
C7 C6 H6 119.7 . . ? 
C5 C6 H6 119.7 . . ? 
C6 C7 C8 118.68(17) . . ? 
C6 C7 H7 120.7 . . ? 
C8 C7 H7 120.7 . . ? 
C9 C8 C7 122.70(17) . . ? 
C9 C8 N1 118.76(16) . . ? 
C7 C8 N1 118.47(17) . . ? 
C8 C9 C10 118.19(17) . . ? 
C8 C9 H9 120.9 . . ? 
C10 C9 H9 120.9 . . ? 
C9 C10 C5 120.94(17) . . ? 
C9 C10 H10 119.5 . . ? 
C5 C10 H10 119.5 . . ? 
C12 C11 C16 120.01(16) . . ? 
C12 C11 P1 118.28(13) . . ? 
C16 C11 P1 121.59(14) . . ? 
C13 C12 C11 120.25(17) . . ? 
C13 C12 H12 119.9 . . ? 
C11 C12 H12 119.9 . . ? 
C12 C13 C14 119.56(19) . . ? 
C12 C13 H13 120.2 . . ? 
C14 C13 H13 120.2 . . ? 
C15 C14 C13 120.65(18) . . ? 
C15 C14 H14 119.7 . . ? 
C13 C14 H14 119.7 . . ? 
C14 C15 C16 120.09(18) . . ? 
C14 C15 H15 120.0 . . ? 
C16 C15 H15 120.0 . . ? 
C15 C16 C11 119.40(18) . . ? 
C15 C16 H16 120.3 . . ? 
C11 C16 H16 120.3 . . ? 
C18 C17 C22 119.69(18) . . ? 
C18 C17 P1 117.40(14) . . ? 
C22 C17 P1 122.83(15) . . ? 
C19 C18 C17 120.06(19) . . ? 
C19 C18 H18 120.0 . . ? 
C17 C18 H18 120.0 . . ? 
C20 C19 C18 119.8(2) . . ? 
C20 C19 H19 120.1 . . ? 
C18 C19 H19 120.1 . . ? 
C21 C20 C19 120.6(2) . . ? 
C21 C20 H20 119.7 . . ? 
C19 C20 H20 119.7 . . ? 
C20 C21 C22 120.2(2) . . ? 
C20 C21 H21 119.9 . . ? 
C22 C21 H21 119.9 . . ? 
C21 C22 C17 119.6(2) . . ? 
C21 C22 H22 120.2 . . ? 
C17 C22 H22 120.2 . . ? 
C28 C23 C24 119.95(17) . . ? 
C28 C23 P1 119.43(13) . . ? 
C24 C23 P1 120.60(14) . . ? 
C25 C24 C23 119.72(17) . . ? 
C25 C24 H24 120.1 . . ? 
C23 C24 H24 120.1 . . ? 
C24 C25 C26 120.22(17) . . ? 
C24 C25 H25 119.9 . . ? 
C26 C25 H25 119.9 . . ? 
C27 C26 C25 120.22(17) . . ? 
C27 C26 H26 119.9 . . ? 
C25 C26 H26 119.9 . . ? 
C26 C27 C28 120.00(18) . . ? 
C26 C27 H27 120.0 . . ? 
C28 C27 H27 120.0 . . ? 
C23 C28 C27 119.88(17) . . ? 
C23 C28 H28 120.1 . . ? 
C27 C28 H28 120.1 . . ? 
C30 C29 C3 128.81(17) . . ? 
C30 C29 H29 115.6 . . ? 
C3 C29 H29 115.6 . . ? 
C29 C30 C31 118.29(16) . . ? 
C29 C30 H30 120.9 . . ? 
C31 C30 H30 120.9 . . ? 
O6 C31 O5 122.80(16) . . ? 
O6 C31 C30 125.18(17) . . ? 
O5 C31 C30 112.02(15) . . ? 
O5 C32 H32A 109.5 . . ? 
O5 C32 H32B 109.5 . . ? 
H32A C32 H32B 109.5 . . ? 
O5 C32 H32C 109.5 . . ? 
H32A C32 H32C 109.5 . . ? 
H32B C32 H32C 109.5 . . ? 
Cl2 C33 Cl1 112.64(12) . . ? 
Cl2 C33 H33A 109.1 . . ? 
Cl1 C33 H33A 109.1 . . ? 
Cl2 C33 H33B 109.1 . . ? 
Cl1 C33 H33B 109.1 . . ? 
H33A C33 H33B 107.8 . . ? 
O1 N1 O2 123.58(16) . . ? 
O1 N1 C8 118.39(16) . . ? 
O2 N1 C8 118.03(16) . . ? 
C4 O3 C1 108.32(13) . . ? 
C31 O5 C32 114.55(15) . . ? 
C2 P1 C17 107.72(8) . . ? 
C2 P1 C23 114.28(8) . . ? 
C17 P1 C23 109.23(9) . . ? 
C2 P1 C11 110.38(8) . . ? 
C17 P1 C11 109.07(8) . . ? 
C23 P1 C11 106.06(8) . . ? 
 
_diffrn_measured_fraction_theta_max    0.999 
_diffrn_reflns_theta_full              26.45 
_diffrn_measured_fraction_theta_full   0.999 
_refine_diff_density_max    0.526 
_refine_diff_density_min   -0.359 
_refine_diff_density_rms    0.062 
